# Supplementary material for: 1,4-Naphthoquinone Analogues: Potent Antibacterial Agents and Mode of Action Evaluation
Source: MDPI journal article supplement (doi:10.3390/molecules24071437), 2019-04-11
Supplement: s1 [file s1]

## Supplementary Material

# 1,4-Naphthoquinone Analogues: Potent Antibacterial Agents and Mode of Action Evaluation

Palanisamy Ravichandiran <sup>1</sup>, Sunirmal Sheet <sup>2</sup>, Dhanraj Premnath <sup>3</sup>, Ae Rhan Kim <sup>4,\*</sup> and Dong Jin Yoo <sup>1,\*</sup>

<sup>1</sup> Department of Life Science, Department of Energy Storage/Conversion Engineering of Graduate School, and Hydrogen and Fuel Cell Research Center, Chonbuk National University, Jeollabuk-do 54896, Republic of Korea; ravichandru55@gmail.com

<sup>2</sup> Department of Forest Science and Technology, College of Agriculture and Life Sciences, Chonbuk National University, 567 Baekje-daero, Deokjin-gu, Jeonju-si 561-756, Jeollabuk-do, Republic of Korea; sunirmal.micro@gmail.com

<sup>3</sup> Department of Biotechnology, Karunya Institute of Technology and Science, School of Agriculture and Biosciences, Karunya Nagar, Coimbatore-641114, Tamil Nadu, India; prems.bioinfo@gmail.com

<sup>4</sup> R&D Center for CANUTECH, Business Incubation Center, Department of Bioenvironmental Chemistry, Chonbuk National University, Jeollabuk-do 54896, Republic of Korea

\* Correspondence: djyoo@jbnu.ac.kr (D.J.Y.); canutech@hanmail.net (A.R.K.); Tel.: +82-(0)63-270-3608/+82-(0)10-2110-2328 Fax: +82-(0)63-270-3909 (D. J. Y.)

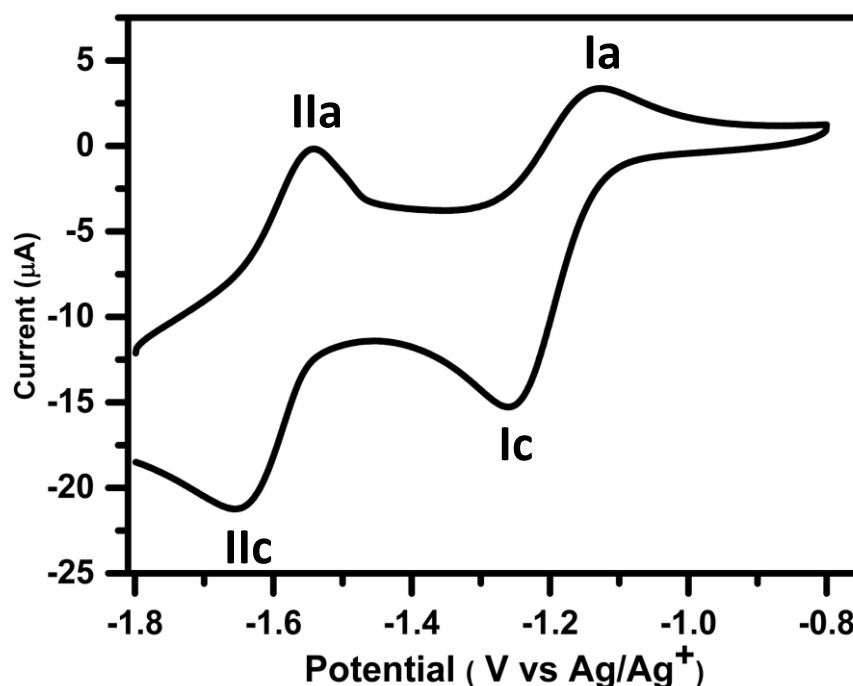

**Figure 1.** Cyclic voltammetry (CV) of 5f (1 mM) in CH<sub>3</sub>CN + Bu<sub>4</sub>NBF<sub>4</sub> (0.1 M) on glassy carbon electrode (GCE) with cathodic direction, potential range: -0.8 V up to -2.0 V,  $v = 0.1 \text{ V s}^{-1}$ .

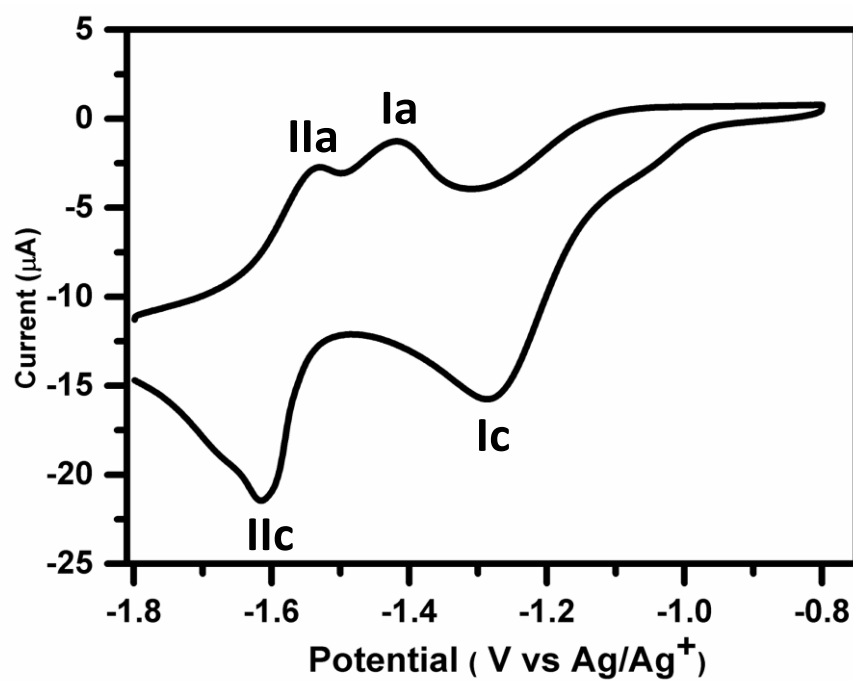

**Figure S2.** Cyclic voltammetry (CV) of **5x** (1 mM) in CH<sub>3</sub>CN + Bu<sub>4</sub>NBF<sub>4</sub> (0.1 M) on glassy carbon electrode (GCE) with cathodic direction, potential range: -0.8 V up to -2.0 V,  $v = 0.1 \text{ V s}^{-1}$ .
